# Supplementary material for: Prognostic value of miR-21 for prostate cancer: a systematic review and meta-analysis
Source: PubMed Central journal article supplement (PMC8753345; doi:10.1042/bsr20211972), 2022-01-11
Supplement: BSR-2021-1972_supp.pdf [file BSR-2021-1972_supp.pdf]

## SUPPLEMENTARY FIGURES

a

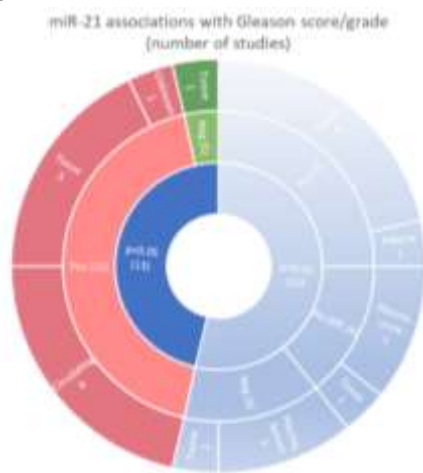

b

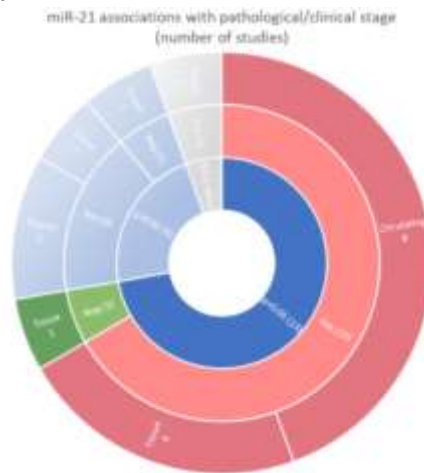

c

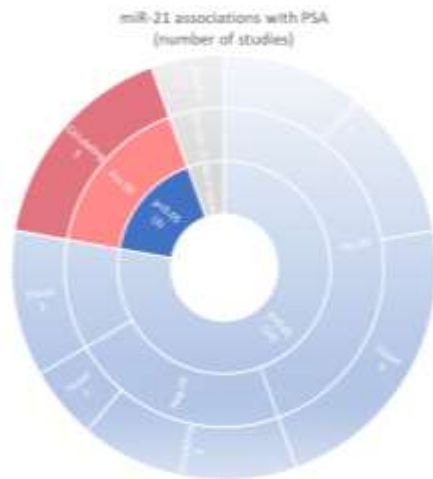

d

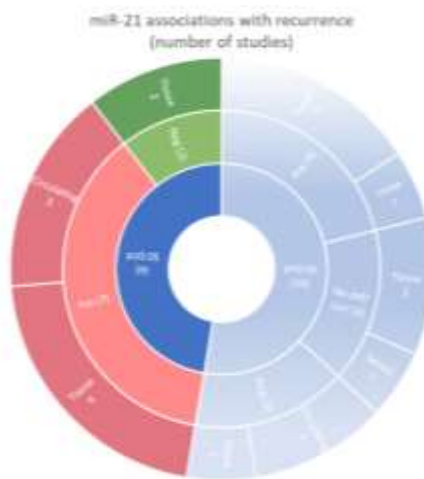

e

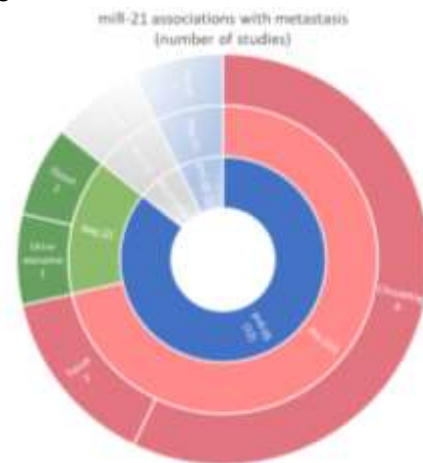

f

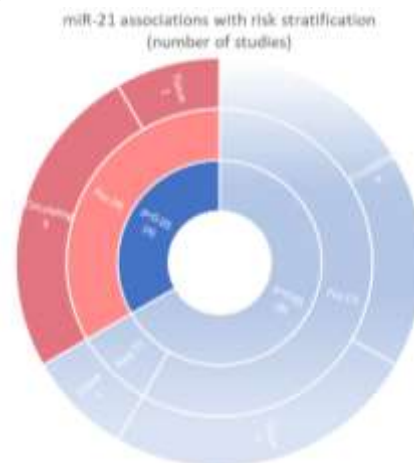

g

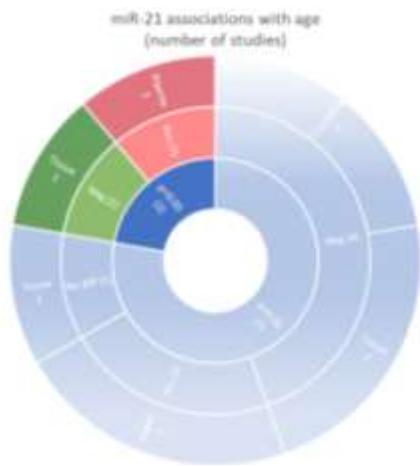

SF 1: Associations of miR-21 expression with clinicopathological measurements. (a) Gleason score/grade, (b) Stage, (c) PSA, (d) Recurrence, (e) Metastasis, (f) Risk stratification and (g) Age at diagnosis

## ST 1: Search strategies in electronic databases

---

### Medline (Ovid)

1. exp MicroRNAs/
  2. (microRNA or miRNA or microRNA-21 or microRNA21 or miRNA-21 or miRNA21 or miR-21 or miR21)
  3. exp Prostatic Neoplasms/
  4. (prostat\* cancer\* or prostat\* carcinoma\* or prostat\* tumo?r\* or prostat\* neoplasm\* or prostat\* adenocarcinoma\* or PRAD)
  
  5. exp Biomarkers/
  6. exp Prognosis/
  7. exp Survival Analysis/
  8. (biomarker\* or marker\* or prognos\* or survival)
  9. 1 or 2
  10. 3 or 4
  11. 5 or 6 or 7 or 8
  12. 9 and 10 and 11
  13. limit 12 to yr="2010 -Current"
  14. limit 13 to english language
  15. limit 14 to (case reports or editorial or english abstract or letter or meta analysis or "review" or "systematic review")
  16. 14 not 15
- 

### EMBASE

1. exp microRNA 21/
  2. exp microRNA/
  3. (microRNA or miRNA or microRNA-21 or microRNA21 or miRNA-21 or miRNA21 or miR-21 or miR21)
  4. 1 or 3
  5. exp prostate cancer/
  6. (prostat\* cancer\* or prostat\* carcinoma\* or prostat\* tumo?r\* or prostat\* neoplasm\* or prostat\* adenocarcinoma\* or PRAD)
  
  7. 5 or 6
  8. exp prognosis/
  9. exp biological marker/
  10. exp survival/ or exp survival analysis/
  11. (biomarker\* or marker\* or prognos\* or survival)
  12. 8 or 9 or 10 or 11
  13. 4 and 7
  14. 12 and 13
  15. limit 14 to yr="2010 -Current"
  16. limit 15 to english language
  17. limit 16 to (meta analysis or "systematic review")
  18. limit 16 to (books or chapter or conference abstract or editorial or letter or "review" or short survey)
  19. 17 or 18
  20. 16 not 19
- 

### Web of Science (Core Collection)

1. TOPIC: ("microRNA-21" OR "microRNA21" OR "miRNA-21" OR "miRNA21" OR "miR-21" OR "miR21" OR microRNA OR miRNA)
  2. TOPIC: ("prostat\* cancer\*" OR "prostat\* carcinoma\*" OR "prostat\* tumo?r\*" OR "prostat\* neoplasm\*" OR "prostat\* adenocarcinoma\*" OR PRAD)
  3. TOPIC: (biomarker\* or marker\* or prognos\* or survival)
  4. #3 AND #2 AND #1 Refined by: [excluding] PUBLICATION YEARS: ( 2008 OR 2007 OR 2006 OR 2009 ) AND LANGUAGES: ( ENGLISH ) AND [excluding] DOCUMENT TYPES: ( EDITORIAL MATERIAL OR LETTER OR REVIEW OR PROCEEDINGS PAPER OR RETRACTED PUBLICATION OR RETRACTION OR MEETING ABSTRACT OR BOOK CHAPTER )
- 

### Scopus

( TITLE-ABS-KEY ( biomarker\* OR marker\* OR prognos\* OR survival ) ) AND ( ( TITLE-ABS-KEY ( "microRNA-21" OR "microRNA21" OR "miRNA-21" OR "miRNA21" OR "miR-21" OR "miR21" OR "circulating microRNA\*" ) ) AND ( TITLE-ABS-KEY ( "prostat\* cancer\*" OR "prostat\* carcinoma\*" OR "prostat\* tumo?r\*" OR "prostat\* neoplasm\*" OR "prostat\* adenocarcinoma\*" OR prad ) ) ) AND ( EXCLUDE ( PUBYEAR , 2009 ) OR EXCLUDE ( PUBYEAR , 2008 ) ) AND ( LIMIT-TO ( LANGUAGE , "English" ) ) AND ( EXCLUDE ( DOCTYPE , "ch" ) OR EXCLUDE ( DOCTYPE , "ed" ) OR EXCLUDE ( DOCTYPE , "sh" ) OR EXCLUDE ( DOCTYPE , "no" ) ) AND ( LIMIT-TO ( DOCTYPE , "ar" ) )

---

### Cochrane Library

microRNA-21 or microRNA21 or miRNA-21 or miRNA21 or miR-21 or miR21 or microRNA or miRNA or miR in All Text AND prostate or prostatic in Title Abstract Keyword AND cancer or carcinoma or tumour or tumor or neoplasm or adenocarcinoma or PRAD in Title Abstract Keyword AND biomarker or marker or prognostic or prognosis or survival in Title Abstract Keyword

---

*ST 2: Data items included in Covidence data extraction form (Adapted from CHARMS-PF checklist<sup>22</sup>)*

**General information**

Study ID  
Title  
Lead author and contact details  
Country in which the study conducted  
Study funding sources  
Possible conflicts of interest for study authors  
Notes

**Source of data**

Source of data (e.g., cohort, case control, randomised trial or registry data)

**Participants**

Participant eligibility and recruitment method  
Participant description  
Details of treatments received (if relevant)  
Study dates

**Outcomes to be predicted**

Definition and method for measurement of outcomes  
Was the same outcome definition (and method for measurement) used in all participants?  
Types of outcomes  
Were the outcomes assessed without knowledge of the candidate prognostic factors (i.e., blinded)?  
Were candidate prognostic factors part of the outcome?  
Time of outcome occurrence or summary of duration of follow-up

**Prognostic factors (index and comparator)**

Number and type of prognostic factors  
Definition and method for measurement of prognostic factors  
Timing of prognostic factor measurement  
Were prognostic factors assessed blinded for outcome, and for each other (if relevant)?  
Handling of prognostic factors in the analysis

**Sample size**

Was a sample size calculation conducted and, if so, how?  
Number of participants and number of outcomes or events  
Number of outcomes or events in relation to the number of candidate prognostic factors (events per variable)

**Missing data**

Number of participants with any missing value  
Number of participants with missing data for miR-21 expression  
Details of attrition (loss to follow-up) and, for time-to-event outcomes, number of censored observations  
Handling of missing data

**Analysis (N/A for studies excluded from meta-analysis)**

Modelling method  
How modelling assumptions were checked; the method for assessing non-proportional hazards  
Method for selection of prognostic factors for inclusion in multivariable modelling  
Method for selection or exclusion of prognostic factors during multivariable modelling, and criteria used for any selection or exclusion  
Method of handling each continuous prognostic factor, including values of any cut points used and their justification

**Results of studies included in meta-analysis**

Unadjusted and adjusted prognostic effect estimates for miR-21 expression, the corresponding 95% confidence interval with p-value.  
For the extracted adjusted prognostic effect estimate of interest, the set of adjustment factors used

**Results of studies excluded from meta-analysis**

Prognostic factors or stratification used for association analysis  
Type of association analysis and estimates with p-value

**Interpretation and discussion**

Interpretation of presented results  
Comparison with other studies, discussion of generalisability, strengths and limitations

ST 3: Records of authors contacted (12 studies)

| Study ID                            | Author contacted                                                                                                                                                                                                                  | Response | Additional data                                                        |
|-------------------------------------|-----------------------------------------------------------------------------------------------------------------------------------------------------------------------------------------------------------------------------------|----------|------------------------------------------------------------------------|
| <b>Bryant2012</b> <sup>36</sup>     | Freddie Hamdy<br>< <a href="mailto:freddie.hamdy@nds.ox.ac.uk">freddie.hamdy@nds.ox.ac.uk</a> ><br>Richard Bryant<br>< <a href="mailto:richard.bryant@nds.ox.ac.uk">richard.bryant@nds.ox.ac.uk</a> >                             | Yes      | miR-21 raw data excel file including 78 PCa patients                   |
| <b>Fendler2011</b> <sup>40</sup>    | Klaus Jung<br>< <a href="mailto:klaus.jung@charite.de">klaus.jung@charite.de</a> >                                                                                                                                                | Yes      | No (Communication stopped without useful data)                         |
| <b>Huang2015a</b> <sup>46</sup>     | Liang Wang<br>< <a href="mailto:liwang@mcw.edu">liwang@mcw.edu</a> >                                                                                                                                                              | No       |                                                                        |
| <b>Kelly2015</b> <sup>52</sup>      | Brian Kelly<br>< <a href="mailto:drbriankelly@hotmail.com">drbriankelly@hotmail.com</a> >                                                                                                                                         | Yes      | No (Communication stopped without useful data)                         |
| <b>Leite2013</b> <sup>59</sup>      | Katia Ramos Moreira Leite                                                                                                                                                                                                         | Yes      | Clarification on results reported                                      |
| <b>Leite2015</b> <sup>60</sup>      | Updated: < <a href="mailto:katiaramos@usp.br">katiaramos@usp.br</a> >                                                                                                                                                             |          | Details of multivariate analysis                                       |
| <b>Lin2014</b> <sup>64</sup>        | Hui-Ming Lin                                                                                                                                                                                                                      | Yes      | Clarification on analysis method                                       |
| <b>Lin2017</b> <sup>65</sup>        | < <a href="mailto:h.lin@garvan.org.au">h.lin@garvan.org.au</a> >                                                                                                                                                                  |          | Results of univariate & multivariate analyses                          |
| <b>McDonald2019</b> <sup>67</sup>   | Alicia McDonald<br>< <a href="mailto:amcdonald3@phs.psu.edu">amcdonald3@phs.psu.edu</a> >                                                                                                                                         | Yes      | No (miR-21 measured but not analysed because it did not meet criteria) |
| <b>Mortensen2014</b> <sup>69</sup>  | Lars Dyrskjødt Andersen<br>< <a href="mailto:lars@clin.au.dk">lars@clin.au.dk</a> >                                                                                                                                               | Yes      | Raw unanalysed data                                                    |
| <b>Schubert2013</b> <sup>76</sup>   | Maria Schubert<br>< <a href="mailto:schubert_m@klinik.uni-wuerzburg.de">schubert_m@klinik.uni-wuerzburg.de</a> ><br>Burkhard Kneitz<br>< <a href="mailto:kneitz_b@klinik.uni-wuerzburg.de">kneitz_b@klinik.uni-wuerzburg.de</a> > | No       |                                                                        |
| <b>Stuopelyte2016</b> <sup>81</sup> | Sonata Jarmalaite<br>< <a href="mailto:sonata.jarmalaite@gf.vu.lt">sonata.jarmalaite@gf.vu.lt</a> ><br>< <a href="mailto:sonata.jarmalaite@nvi.lt">sonata.jarmalaite@nvi.lt</a> >                                                 | No       |                                                                        |

ST 4: QUIPS (Quality in Prognostic Factor Studies) risk of bias classification tool<sup>26</sup>

| QUIPS domains                 |                                                                                                                                                                                                                                                                                                                                                                                                                                                                                                                                                                                             |                                                                                                                                 |                                                                                                                                       |
|-------------------------------|---------------------------------------------------------------------------------------------------------------------------------------------------------------------------------------------------------------------------------------------------------------------------------------------------------------------------------------------------------------------------------------------------------------------------------------------------------------------------------------------------------------------------------------------------------------------------------------------|---------------------------------------------------------------------------------------------------------------------------------|---------------------------------------------------------------------------------------------------------------------------------------|
| <b>Signalling items</b>       | <b>1. Study participation</b><br>(a) Adequate participation in the study by eligible persons<br>(b) Description of the target population or population of interest<br>(c) Description of the baseline study sample<br>(d) Adequate description of the sampling frame and recruitment<br>(e) Adequate description of the period and place of recruitment<br>(f) Adequate description of inclusion and exclusion criteria                                                                                                                                                                     |                                                                                                                                 |                                                                                                                                       |
| <b>Risk of bias ratings *</b> | <b>HIGH</b><br>The relationship between the PF and outcome is very likely to be different for participants and eligible non-participants                                                                                                                                                                                                                                                                                                                                                                                                                                                    | <b>MODERATE</b><br>The relationship between the PF and outcome may be different for participants and eligible non-participants  | <b>LOW</b><br>The relationship between the PF and outcome is unlikely to be different for participants and eligible non-participants  |
| <b>Signalling items</b>       | <b>2. Study attrition</b><br>(a) Adequate response rate for study participants<br>(b) Description of attempts to collect information on participants who dropped out<br>(c) Reasons for loss to follow-up are provided<br>(d) Adequate description of participants lost to follow-up<br>(e) There are no important differences between participants who completed the study and those who did not                                                                                                                                                                                           |                                                                                                                                 |                                                                                                                                       |
| <b>Risk of bias ratings *</b> | <b>HIGH</b><br>The relationship between the PF and outcome is very likely to be different for completing and non-completing participants                                                                                                                                                                                                                                                                                                                                                                                                                                                    | <b>MODERATE</b><br>The relationship between the PF and outcome may be different for completing and non-completing participants  | <b>LOW</b><br>The relationship between the PF and outcome is unlikely to be different for completing and non-completing participants  |
| <b>Signalling items</b>       | <b>3. Prognostic factor measurement</b><br>(a) A clear definition or description of the PF is provided<br>(b) Method of PF measurement is adequately valid and reliable<br>(c) Continuous variables are reported or appropriate cut-points are used<br>(d) The method and setting of measurement of PF is the same for all study participants<br>(e) Adequate proportion of the study sample has complete data for the PF<br>(f) Appropriate methods of imputation are used for missing PF data                                                                                             |                                                                                                                                 |                                                                                                                                       |
| <b>Risk of bias ratings *</b> | <b>HIGH</b><br>The measurement of the PF is very likely to be different for different levels of the outcome of interest                                                                                                                                                                                                                                                                                                                                                                                                                                                                     | <b>MODERATE</b><br>The measurement of the PF may be different for different levels of the outcome of interest                   | <b>LOW</b><br>The measurement of the PF is unlikely to be different for different levels of the outcome of interest                   |
| <b>Signalling items</b>       | <b>4. Outcome measurement</b><br>(a) A clear definition of the outcome is provided<br>(b) Method of outcome measurement used is adequately valid and reliable<br>(c) The method and setting of outcome measurement is the same for all study participants                                                                                                                                                                                                                                                                                                                                   |                                                                                                                                 |                                                                                                                                       |
| <b>Risk of bias ratings *</b> | <b>HIGH</b><br>The measurement of the outcome is very likely to be different related to the baseline level of the PF                                                                                                                                                                                                                                                                                                                                                                                                                                                                        | <b>MODERATE</b><br>The measurement of the outcome may be different related to the baseline level of the PF                      | <b>LOW</b><br>The measurement of the outcome is unlikely to be different related to the baseline level of the PF                      |
| <b>Signalling items</b>       | <b>5. Adjustment for covariates</b><br>(a) All other important covariates are measured<br>(b) Clear definitions of the important covariates measured are provided<br>(c) Measurement of all important covariates is adequately valid and reliable<br>(d) The method and setting of covariate measurement are the same for all study participants<br>(e) Appropriate methods are used to deal with missing values of covariates, such as multiple imputation<br>(f) Important covariates are accounted for in the study design<br>(g) Important covariates are accounted for in the analysis |                                                                                                                                 |                                                                                                                                       |
| <b>Risk of bias ratings *</b> | <b>HIGH</b><br>The observed effect of the covariate on the outcome is very likely to be distorted by another factor related to PF and outcome                                                                                                                                                                                                                                                                                                                                                                                                                                               | <b>MODERATE</b><br>The observed effect of the covariate on outcome may be distorted by another factor related to PF and outcome | <b>LOW</b><br>The observed effect of the covariate on outcome is unlikely to be distorted by another factor related to PF and outcome |
| <b>Signalling items</b>       | <b>6. Statistical analysis and reporting</b><br>(a) Sufficient presentation of data to assess the adequacy of the analytic strategy<br>(b) Strategy for model building is appropriate and is based on a conceptual framework or model<br>(c) The selected statistical model is adequate for the design of the study<br>(d) There is no selective reporting of results                                                                                                                                                                                                                       |                                                                                                                                 |                                                                                                                                       |
| <b>Risk of bias ratings *</b> | <b>HIGH</b><br>The reported results are very likely to be spurious or biased related to analysis or reporting                                                                                                                                                                                                                                                                                                                                                                                                                                                                               | <b>MODERATE</b><br>The reported results may be spurious or biased related to analysis or reporting                              | <b>LOW</b><br>The reported results are unlikely to be spurious or biased related to analysis or reporting                             |

\* Risk of bias is rated as **Unclear** when there is insufficient information to inform judgment.

PF: Prognostic factor

ST 5: Reasons for exclusion of 13 full-text articles

| Reason for exclusion                     | Full-text articles                                                                             |
|------------------------------------------|------------------------------------------------------------------------------------------------|
| No prognostic data (n=8)                 | Benoist2020; Egidi2013; Li2015; Liu2018; Martens-Uzunova2012; Osipov2016; Valera2020; Yang2015 |
| miR-21 not studied (n=4)                 | Haldrup2014; Knyazev2016; Moltzahn2011; Nam2015                                                |
| Non-original human prognostic data (n=1) | Kumar2018                                                                                      |

**Benoist2020**

Benoist, G.E., van Oort, I.M., Boerrigter, E., Verhaegh, G.W., van Hooij, O., Groen, L., Smit, F., de Mol, P., Hamberg, P., Dezentjé, V.O. and Mehra, N., 2020. Prognostic Value of Novel Liquid Biomarkers in Patients with Metastatic Castration-Resistant Prostate Cancer Treated with Enzalutamide: A Prospective Observational Study. *Clinical Chemistry*, 66(6), pp.842-851.

**Egidi2013**

Egidi, M.G., Cochetti, G., Serva, M.R., Guelfi, G., Zampini, D., Mechelli, L. and Mearini, E., 2013. Circulating microRNAs and kallikreins before and after radical prostatectomy: are they really prostate cancer markers?. *BioMed research international*, 2013.

**Haldrup2014**

Haldrup, C., Kosaka, N., Ochiya, T., Borre, M., Høyer, S., Orntoft, T.F. and Sorensen, K.D., 2014. Profiling of circulating microRNAs for prostate cancer biomarker discovery. *Drug delivery and translational research*, 4(1), pp.19-30.

**Knyazev2016**

Knyazev, E., Samatov, T., Fomicheva, K., Nyushko, K., Alekseev, B. and Shkurnikov, M., 2016. MicroRNA hsa-miR-4674 in hemolysis-free blood plasma is associated with distant metastases of prostatic cancer. *Bulletin of Experimental Biology & Medicine*, 161(1).

**Kumar2018**

Kumar, B., Rosenberg, A.Z., Choi, S.M., Fox-Talbot, K., De Marzo, A.M., Nonn, L., Brennen, W.N., Marchionni, L., Halushka, M.K. and Lupold, S.E., 2018. Cell-type specific expression of oncogenic and tumor suppressive microRNAs in the human prostate and prostate cancer. *Scientific reports*, 8(1), pp.1-13.

**Li2015**

Li, M., Rai, A.J., DeCastro, G.J., Zeringer, E., Barta, T., Magdaleno, S., Setterquist, R. and Vlassov, A.V., 2015. An optimized procedure for exosome isolation and analysis using serum samples: application to cancer biomarker discovery. *Methods*, 87, pp.26-30.

**Liu2018**

Liu, R.S., Olkhov-Mitsel, E., Jeyapala, R., Zhao, F., Commisso, K., Klotz, L., Loblaw, A., Liu, S.K., Vesprini, D., Fleshner, N.E. and Bapat, B., 2018. Assessment of serum microRNA biomarkers to predict reclassification of prostate cancer in patients on active surveillance. *The Journal of urology*, 199(6), pp.1475-1481.

**Martens-Uzunova2012**

Martens-Uzunova, E.S., Jalava, S.E., Dits, N.F., Van Leenders, G.J.L.H., Møller, S., Trapman, J., Bangma, C.H., Litman, T., Visakorpi, T. and Jenster, G., 2012. Diagnostic and prognostic signatures from the small non-coding RNA transcriptome in prostate cancer. *Oncogene*, 31(8), pp.978-991.

**Moltzahn2011**

Moltzahn, F., Olshen, A.B., Baehner, L., Peek, A., Fong, L., Stöppler, H., Simko, J., Hilton, J.F., Carroll, P. and Blelloch, R., 2011. Microfluidic-based multiplex qRT-PCR identifies diagnostic and prognostic microRNA signatures in the sera of prostate cancer patients. *Cancer research*, 71(2), pp.550-560.

**Nam2015**

Nam, R.K., Amemiya, Y., Benatar, T., Wallis, C.J., Stojic-Bendavid, J., Bacopulos, S., Sherman, C., Sugar, L., Naeim, M., Yang, W. and Zhang, A., 2015. Identification and validation of a five microRNA signature predictive of prostate cancer recurrence and metastasis: a cohort study. *Journal of Cancer*, 6(11), p.1160.

**Osipov2016**

Osipov, I.D., Zaporozhchenko, I.A., Bondar, A.A., Zaripov, M.M., Voytsitskiy, V.E., Vlassov, V.V., Laktionov, P.P. and Morozkin, E.S., 2016. Cell-free miRNA-141 and miRNA-205 as prostate cancer biomarkers. In *Circulating Nucleic Acids in Serum and Plasma—CNAPS IX* (pp. 9-12). Springer, Cham.

**Valera2020**

Valera, V.A., Parra-Medina, R., Walter, B.A., Pinto, P. and Merino, M.J., 2020. microRNA expression profiling in young prostate cancer patients. *Journal of Cancer*, 11(14), p.4106.

**Yang2015**

Yang, C.H., Pfeffer, S.R., Sims, M., Yue, J., Wang, Y., Linga, V.G., Paulus, E., Davidoff, A.M. and Pfeffer, L.M., 2015. The oncogenic microRNA-21 inhibits the tumor suppressive activity of FBXO11 to promote tumorigenesis. *Journal of Biological Chemistry*, 290(10), pp.6037-6046.

ST 6: Characteristics of included studies and references (n=64)

| Ref no. | Study ID             | Study size                      | miR-21 source        | miR-21 -5p/-3p | Comparator                                                                                                                        | Association              |
|---------|----------------------|---------------------------------|----------------------|----------------|-----------------------------------------------------------------------------------------------------------------------------------|--------------------------|
| 29      | Agaoglu2011          | 51                              | plasma               | Not specified  | PSA, metastasis                                                                                                                   | Correlation, median diff |
| 30      | Al-Qatati2017        | 79                              | plasma               | miR-21-5p      | GS, pT, PSA, risk groups                                                                                                          | FC                       |
| 31      | <b>Amankwah 2013</b> | 65                              | tissue               | Not specified  | Aggressiveness (determined by GS or stage), recurrence (BCR/clinical metastasis/PCa death)                                        | % diff                   |
| 32      | Arisan2020           | 40                              | tissue               | Not specified  | GS                                                                                                                                | % diff                   |
| 33      | Bell2015 *           | 43                              | tissue               | Not specified  | <i>(Raw data of m-R-21 in GEO not analysed. No other miR-21 data available.)</i>                                                  |                          |
| 34      | Bonci2016            | 15                              | tissue               | Not specified  | Metastasis                                                                                                                        | % diff                   |
| 35      | Brase2011            | 21                              | serum                | Not specified  | Metastasis                                                                                                                        | FC                       |
| 36      | Bryant2012 *         | 78                              | plasma               | Not specified  | <i>(Author provided miR-21 raw data excel file.)</i>                                                                              |                          |
| 37      | Danarto2020          | 60                              | urine exosome        | miR-21-5p      | Metastasis                                                                                                                        | Mean diff                |
| 38      | Endzeliņš 2017 *     | 50                              | plasma or exosome    | miR-21-5p      | <i>(Comparison and ROC curve of miR-21 expression between GS≥8 &amp; ≤6 were done but not shown due to insignificant result.)</i> |                          |
| 39      | Farran2018           | 114                             | plasma               | Not specified  | Aggressiveness (determined by GS)                                                                                                 | OR                       |
| 40      | Fendler2011 *        | 52                              | tissue               | Not specified  | <i>(Communication with authors failed to obtain full list of differentially expressed miRNAs.)</i>                                |                          |
| 41      | Foj2017              | 60                              | urine, urine exosome | miR-21-5p      | GS, D'Amico risk groups                                                                                                           | Mean diff                |
| 42      | <b>Guan2016</b>      | 85                              | tissue               | Not specified  | GS, PSA, metastasis, age                                                                                                          | Correlation              |
| 43      | Gurbuz2020           | 65                              | whole blood          | Not specified  | GS, TNM, PSA                                                                                                                      | FC diff                  |
| 44      | Hart2014             | 20                              | tissue               | Not specified  | pT                                                                                                                                | FC diff                  |
| 45      | Hoey2019             | 75                              | serum                | miR-21-5p      | Risk groups                                                                                                                       | FC                       |
| 46      | Huang2015a *         | Screening =23<br>Follow-up =100 | plasma exosome       | miR-21-5p      | <i>(miR-21 raw data in supplemental materials; overall survival might have been analysed but contact author failed.)</i>          |                          |
| 47      | Huang2015b           | 75                              | PBMC                 | Not specified  | pT, cT, pN, metastasis, recurrence, age                                                                                           | Mean diff                |
| 48      | Ibrahim2019a         | 100                             | plasma               | Not specified  | GS, pT, metastasis, DRE, prostate volume                                                                                          | Correlation, mean diff   |
| 49      | Ibrahim2019b         | 80                              | plasma               | Not specified  | GS, pT, PSA, metastasis, DRE, prostate volume                                                                                     | Median diff              |
| 50      | Ju2019               | 88                              | serum                | Not specified  | GS, pT, PSA, metastasis, BCR, risk groups                                                                                         | Mean diff                |
| 51      | Katz2014             | 51                              | tissue               | Not specified  | GS, pT, PSA, BCR, risk groups                                                                                                     | Mean diff                |
| 52      | Kelly2015 *          | 75                              | whole blood          | Not specified  | <i>(miR-21 was among the 12 selected for expression profiling, but data wasn't presented. Author stopped communication.)</i>      |                          |
| 53      | Kopcalic2019         | 15                              | PBMC                 | Not specified  | Acute genitourinary radiotoxicity                                                                                                 | Mean diff                |
| 54      | Kotb2014             | 10                              | serum                | Not specified  | GS                                                                                                                                | Correlation              |
| 55      | Kristensen 2016      | Training =134<br>Validation     | tissue               | miR-21-3p      | GS, BCR                                                                                                                           | FC, correlation          |



|           |                             |                                  |                 |                         |                                                                                                                                                                                              |                 |
|-----------|-----------------------------|----------------------------------|-----------------|-------------------------|----------------------------------------------------------------------------------------------------------------------------------------------------------------------------------------------|-----------------|
|           |                             | =138                             |                 |                         |                                                                                                                                                                                              |                 |
| 56        | Kurul2019                   | 45                               | tissue          | Not specified           | Gleason upgrade, BCR                                                                                                                                                                         | FC diff         |
| 57        | Leite2011a                  | 22                               | tissue          | Not specified           | Metastasis                                                                                                                                                                                   | Mean diff       |
| 58        | Leite2011b                  | 49                               | tissue          | Not specified           | BCR                                                                                                                                                                                          | Mean diff       |
| 59        | Leite2013 **                | 48                               | tissue          | Not specified           | Risk groups (favourable vs non-favourable)                                                                                                                                                   | Mean diff       |
| <b>60</b> | <b>Leite2015</b>            | Discovery =53<br>Validation =127 | tissue          | miR-21-5p,<br>miR-21-3p | BCR                                                                                                                                                                                          | FC, mean diff   |
| <b>61</b> | <b>Li2012</b>               | 168                              | tissue          | Not specified           | GS, pT, PSA, pN, BCR, age, surgical margin, capsular invasion, organ confined disease                                                                                                        | % diff          |
| 62        | Lichner2013                 | Discovery =41<br>Validation =64  | tissue          | miR-21-5p,<br>miR-21-3p | Risk groups                                                                                                                                                                                  | FC              |
| 63        | Lichner2015                 | Discovery =45<br>Validation =60  | tissue          | miR-21-5p,<br>miR-21-3p | GG                                                                                                                                                                                           | FC              |
| <b>64</b> | <b>Lin2014 *</b>            | 97                               | plasma or serum | Not specified           | <i>(Pre-docetaxel median diff and post-docetaxel median FC in responder vs non-responder compared. Results for miR-21 not shown due to insignificant p-values.)</i>                          |                 |
| <b>65</b> | <b>Lin2017 *</b>            | 87                               | plasma          | Not specified           | <i>(No association analysis with comparator.)</i>                                                                                                                                            |                 |
| 66        | Long2011 *                  | Training =70<br>Validation =40   | tissue          | Not specified           | <i>(miR-21 expression relating to BCR prediction raw data in supplemental materials.)</i>                                                                                                    |                 |
| 67        | McDonald 2019 *             | 66                               | plasma          | Not specified           | <i>(miR-21 expression measured but not analysed because it did not meet study criteria.)</i>                                                                                                 |                 |
| <b>68</b> | <b>Melbø-Jørgensen 2014</b> | 535                              | tissue          | miR-21-5p               | GS, pT, BCR, perineural infiltration, vascular infiltration                                                                                                                                  | Correlation, FC |
| 69        | Mortensen2014 *             | 36                               | tissue          | Not specified           | <i>(miR-21 expression measured but not analysed.)</i>                                                                                                                                        |                 |
| 70        | Nam2018 *                   | 38                               | tissue          | miR-21-5p,<br>miR-21-3p | <i>(miR-21 normalised read count available in GEO, not analysed.)</i>                                                                                                                        |                 |
| 71        | Ostano2020                  | 48                               | tissue          | miR-21-3p               | Neuroendocrine-like vs Adeno PCa                                                                                                                                                             | FC              |
| 72        | Reis2012                    | 53                               | tissue          | Not specified           | GS, pT, PSA, BCR                                                                                                                                                                             | Mean diff       |
| 73        | Ren2014                     | 204                              | tissue          | Not specified           | GS, pT, metastasis, BCR, age, ethnicity, survival, tissue type, hormone therapy                                                                                                              | FC, mean diff   |
| 74        | Samaan2014                  | 95                               | Not stated      | Not specified           | GG                                                                                                                                                                                           | FC              |
| 75        | Sapre2014                   | 36                               | urine           | Not specified           | Risk groups                                                                                                                                                                                  | Ct FC           |
| 76        | Schubert 2013 *             | 13                               | tissue          | Not specified           | <i>(miR-21 tested in microarray; raw data deposited in GEO (GSE18671); not included in further tests because of insignificant differential expression in high-risk PCa compared to BPH.)</i> |                 |
| 77        | Selth2013                   | Screening                        | serum           | Not specified           | BCR                                                                                                                                                                                          | FC              |

|           |                    | =16<br>Validation<br>=70               |                     |               |                                                                                                                                    |                               |
|-----------|--------------------|----------------------------------------|---------------------|---------------|------------------------------------------------------------------------------------------------------------------------------------|-------------------------------|
| <b>78</b> | <b>Sharova2021</b> | 31                                     | plasma              | miR-21-5p     | Haemoglobin;<br>Neutrophil/lymphocyte ratio;<br>PSA; Time to CRPC                                                                  | Correlation                   |
| 79        | Shen2012           | 82                                     | plasma              | Not specified | GS, pT, PSA, BCR, risk groups<br>(CAPRA, D'Amico), age,<br>prostate volume, ethnicity,<br>follow-up time, family history<br>of PCa | Mean diff<br>(copy<br>number) |
| 80        | Singh2014          | 93                                     | serum               | Not specified | Biochemical progression                                                                                                            | Mean diff<br>(delta Ct)       |
| 81        | Stuopelyte<br>2016 | 143                                    | urine               | Not specified | GS, pT, BCR                                                                                                                        | FC                            |
| 82        | Suer2019           | 40                                     | tissue              | miR-21-3p     | BCR                                                                                                                                | FC                            |
| 83        | Watahiki2013       | 50                                     | plasma              | Not specified | mCRPC                                                                                                                              | Mean diff                     |
| <b>84</b> | <b>Yang2016</b>    | 92                                     | PBMC                | Not specified | GS, cT, PSA, metastasis<br>(bone), BCR, age                                                                                        | Mean diff                     |
| <b>85</b> | <b>Zedan2017</b>   | 49                                     | tissue              | Not specified | GS, pT, PSA, risk groups<br>(D'Amico, NCCN)                                                                                        | Correlation                   |
| 86        | Zedan2018          | Screening<br>=46<br>Validation<br>=149 | tissue or<br>plasma | Not specified | GS, PSA                                                                                                                            | Mean diff                     |
| 87        | Zedan2019          | 149                                    | plasma              | Not specified | GS, cT, PSA, risk groups (EAU),<br>age, prostate volume                                                                            | Correlation                   |
| 88        | Zhang2011          | 50                                     | serum               | Not specified | Chemo-resistance                                                                                                                   |                               |
| <b>89</b> | <b>Zhao2019a</b>   | 206                                    | tissue              | miR-21-5p     | ISUP (based on GS), pT, PSA,<br>age, DRE, margin                                                                                   | Correlation                   |
| 90        | Zhao2019b          | 103                                    | urine               | Not specified | PSA, age, %core,<br>reclassification                                                                                               | Correlation                   |
| 91        | Zheng2014          | 118                                    | tissue              | Not specified | Recurrence (BCR/local<br>recurrence/systemic<br>metastases/PCa death)                                                              | Mean diff,<br>OR              |
| 92        | Zhu2019            | 158                                    | tissue              | Not specified | Risk groups (identified by<br>GAS5 SNPs)                                                                                           | FC                            |

Studies in **bold** are eligible for meta-analyses (n=11).

Possible part overlap of participants between Ibrahim2019a<sup>48</sup> and Ibrahim2019b<sup>49</sup>.

\* miR-21 expression measured but no useful data for narrative summary (n=13).

\*\* (Leite2013<sup>59</sup>) A corrigendum would be published in *Urologic Oncology*.

**ARTA:** Androgen receptor-targeted agents; **BCR:** Biochemical recurrence; **BPH:** Benign prostate enlargement; **CAPRA:** Cancer of the Prostate Risk Assessment; **CRPC:** Castration-resistant prostate cancer; **cT:** Clinical tumour stage; **Ct:** Threshold cycle; **diff:** Difference; **DRE:** Digital rectal examination; **EAU:** European Association of Urology; **FC:** Fold change; **GAS5:** Growth Arrest Specific 5; **GEO:** Gene Expression Omnibus; **GG:** Gleason grade; **GS:** Gleason score; **ISUP:** International Society of Urological Pathology; **mCRPC:** Metastatic castration resistant prostate cancer; **miRNAs:** microRNAs; **NCCN:** National Comprehensive Cancer Network; **OR:** Odds ratio; **PBMC:** Peripheral blood mononuclear cell; **PCa:** Prostate cancer; **pN:** Lymph node metastasis; **PSA:** Prostate-specific antigen; **pT:** Pathological tumour stage; **ROC:** Receiver operating characteristic; **SNPs:** Single-nucleotide polymorphisms; **TNM:** Tumour, Node, Metastasis staging

**Agaoğlu2011**

Agaoğlu, F.Y., Kovancilar, M., Dizdar, Y., Darendeliler, E., Holdenrieder, S., Dalay, N. and Gezer, U., 2011. Investigation of miR-21, miR-141, and miR-221 in blood circulation of patients with prostate cancer. *Tumor Biology*, 32(3), pp.583-588.

**Al-Qatati2017**

Al-Qatati, A., Akrong, C., Stevic, I., Pantel, K., Awe, J., Saranchuk, J., Drachenberg, D., Mai, S. and Schwarzenbach, H., 2017. Plasma microRNA signature is associated with risk stratification in prostate cancer patients. *International journal of cancer*, 141(6), pp.1231-1239.

**Amankwah2013 (Analysis 1)**

Amankwah, E.K., Anegebe, E., Park, H., Pow-Sang, J., Hakam, A. and Park, J.Y., 2013. miR-21, miR-221 and miR-222 expression and prostate cancer recurrence among obese and non-obese cases. *Asian journal of andrology*, 15(2), p.226.

**Arisan2020**

Arisan, E.D., Rencuzogullari, O., Freitas, I.L., Radzali, S., Keskin, B., Kothari, A., Warford, A. and Uysal-Onganer, P., 2020. Upregulated Wnt-11 and miR-21 expression trigger epithelial mesenchymal transition in aggressive prostate cancer cells. *Biology*, 9(3), p.52.

**Bell2015**

Bell, E.H., Kirste, S., Fleming, J.L., Stegmaier, P., Drendel, V., Mo, X., Ling, S., Fabian, D., Manring, I., Jilg, C.A. and Schultze-Seemann, W., 2015. A novel miRNA-based predictive model for biochemical failure following post-prostatectomy salvage radiation therapy. *PLoS one*, 10(3), p.e0118745.

**Bonci2016**

Bonci, D., Coppola, V., Patrizii, M., Addario, A., Cannistraci, A., Francescangeli, F., Pecci, R., Muto, G., Collura, D., Bedini, R. and Zeuner, A., 2016. A microRNA code for prostate cancer metastasis. *Oncogene*, 35(9), pp.1180-1192.

**Brase2011**

Brase, J.C., Johannes, M., Schlomm, T., Fälth, M., Haese, A., Steuber, T., Beissbarth, T., Kuner, R. and Sültmann, H., 2011. Circulating miRNAs are correlated with tumor progression in prostate cancer. *International journal of cancer*, 128(3), pp.608-616.

**Bryant2012**

Bryant, R., Pawlowski, T., Catto, J.W.F., Marsden, G., Vessella, R.L., Rhees, B., Kuslich, C., Visakorpi, T. and Hamdy, F.C., 2012. Changes in circulating microRNA levels associated with prostate cancer. *British journal of cancer*, 106(4), pp.768-774.

**Danarto2020**

Danarto, R., Astuti, I., Umbas, R. and Haryana, S.M., 2020. Urine miR-21-5p and miR-200c-3p as potential non-invasive biomarkers in patients with prostate cancer. *Turkish journal of urology*, 46(1), p.26.

**Endzeliņš2017**

Endzeliņš, E., Berger, A., Melne, V., Bajo-Santos, C., Soboļevska, K., Ābols, A., Rodriguez, M., Šantare, D., Rudņickiņa, A., Lietuvietis, V. and Llorente, A., 2017. Detection of circulating miRNAs: comparative analysis of extracellular vesicle-incorporated miRNAs and cell-free miRNAs in whole plasma of prostate cancer patients. *BMC cancer*, 17(1), pp.1-13.

**Farran2018**

Farran, B., Dyson, G., Craig, D., Dombkowski, A., Beebe-Dimmer, J.L., Powell, I.J., Podgorski, I., Heilbrun, L., Bolton, S. and Bock, C.H., 2018. A study of circulating microRNAs identifies a new potential biomarker panel to distinguish aggressive prostate cancer. *Carcinogenesis*, 39(4), pp.556-561.

**Fendler2011**

Fendler, A., Jung, M., Stephan, C., Honey, R.J., Stewart, R.J., Pace, K.T., Erbersdobler, A., Samaan, S., Jung, K. and Yousef, G.M., 2011. miRNAs can predict prostate cancer biochemical relapse and are involved in tumor progression. *International journal of oncology*, 39(5), pp.1183-1192.

**Foj2017**

Foj, L., Ferrer, F., Serra, M., Arévalo, A., Gavagnach, M., Giménez, N. and Filella, X., 2017. Exosomal and non-exosomal urinary miRNAs in prostate cancer detection and prognosis. *The Prostate*, 77(6), pp.573-583.

**Guan2016 (Eligible for meta-analysis but no similar studies)**

Guan, Y., Wu, Y., Liu, Y., Ni, J. and Nong, S., 2016. Association of microRNA-21 expression with clinicopathological characteristics and the risk of progression in advanced prostate cancer patients receiving androgen deprivation therapy. *The Prostate*, 76(11), pp.986-993.

**Gurbuz2020**

Gurbuz, V., Kiliccioglu, I., Dikmen, A.U., Bilen, C.Y., Sozen, S. and Konac, E., 2020. Comparative analysis of epi-miRNA expression levels in local/locally advanced and metastatic prostate cancer patients. *Gene*, 758, p.144963.

**Hart2014**

Hart, M., Nolte, E., Wach, S., Szczyrba, J., Taubert, H., Rau, T.T., Hartmann, A., Grässer, F.A. and Wullich, B., 2014. Comparative

microRNA profiling of prostate carcinomas with increasing tumor stage by deep sequencing. *Molecular cancer research*, 12(2), pp.250-263.

**Hoey2019**

Hoey, C., Ahmed, M., Ghiam, A.F., Vesprini, D., Huang, X., Commisso, K., Commisso, A., Ray, J., Fokas, E., Loblaw, D.A. and He, H.H., 2019. Circulating miRNAs as non-invasive biomarkers to predict aggressive prostate cancer after radical prostatectomy. *Journal of translational medicine*, 17(1), pp.1-11.

**Huang2015a**

Huang, X., Yuan, T., Liang, M., Du, M., Xia, S., Dittmar, R., Wang, D., See, W., Costello, B.A., Quevedo, F. and Tan, W., 2015. Exosomal miR-1290 and miR-375 as prognostic markers in castration-resistant prostate cancer. *European urology*, 67(1), pp.33-41.

**Huang2015b**

Huang, W., Kang, X.L., Cen, S., Wang, Y. and Chen, X., 2015. High-level expression of microRNA-21 in peripheral blood mononuclear cells is a diagnostic and prognostic marker in prostate cancer. *Genetic testing and molecular biomarkers*, 19(9), pp.469-475.

**Ibrahim2019a**

Ibrahim, N.H., Abdellateif, M.S., Thabet, G., Kassem, S.H., El-Salam, M.A., El-Leithy, A.A. and Selim, M.M., 2019. Combining PHI and miRNAs as biomarkers in prostate cancer diagnosis and prognosis. *Clin Lab*, 65(7), p.10.

**Ibrahim2019b** (Possible part overlap of participants with Ibrahim 2019a)

Ibrahim, N.H., Abdellateif, M.S., Kassem, S.H.A., Abd El Salam, M.A. and El Gammal, M.M., 2019. Diagnostic significance of miR-21, miR-141, miR-18a and miR-221 as novel biomarkers in prostate cancer among Egyptian patients. *Andrologia*, 51(10), p.e13384.

**Ju2019**

Ju, G., Lian, J., Wang, Z., Cao, W., Lin, J., Li, Y. and Yin, L., 2019. Correlation between miRNA-21 expression and diagnosis, metastasis and prognosis of prostate cancer. *International Journal of Clinical and Experimental Medicine*, 12(7), pp.8172-8180.

**Katz2014**

Katz, B., Reis, S.T., Viana, N.I., Morais, D.R., Moura, C.M., Dip, N., Silva, I.A., Iscaife, A., Srougi, M. and Leite, K.R., 2014. Comprehensive study of gene and microRNA expression related to epithelial-mesenchymal transition in prostate cancer. *PLoS one*, 9(11), p.e113700.

**Kelly2015**

Kelly, B.D., Miller, N., Sweeney, K.J., Durkan, G.C., Rogers, E., Walsh, K. and Kerin, M.J., 2015. A circulating microRNA signature as a biomarker for prostate cancer in a high risk group. *Journal of clinical medicine*, 4(7), pp.1369-1379.

**Kopcalic2019**

Kopcalic, K., Petrovic, N., Stanojkovic, T.P., Stankovic, V., Bukumiric, Z., Roganovic, J., Malisic, E. and Nikitovic, M., 2019. Association between miR-21/146a/155 level changes and acute genitourinary radiotoxicity in prostate cancer patients: A pilot study. *Pathology-Research and Practice*, 215(4), pp.626-631.

**Kotb2014**

Kotb, S., Mosharafa, A., Essawi, M., Hassan, H., Meshref, A. and Morsy, A., 2014. Circulating miRNAs 21 and 221 as biomarkers for early diagnosis of prostate cancer. *Tumor Biology*, 35(12), pp.12613-12617.

**Kristensen2016**

Kristensen, H., Thomsen, A.R., Haldrup, C., Dyrskjöt, L., Høyer, S., Borre, M., Mouritzen, P., Ørntoft, T.F. and Sørensen, K.D., 2016. Novel diagnostic and prognostic classifiers for prostate cancer identified by genome-wide microRNA profiling. *Oncotarget*, 7(21), p.30760.

**Kurul2019**

Kurul, N.O., Ates, F., Yilmaz, I., Narli, G., Yesildal, C. and Senkul, T., 2019. The association of let-7c, miR-21, miR-145, miR-182, and miR-221 with clinicopathologic parameters of prostate cancer in patients diagnosed with low-risk disease. *The Prostate*, 79(10), pp.1125-1132.

**Leite2011a**

Leite, K.R., Sousa-Canavez, J.M., Reis, S.T., Tomiyama, A.H., Camara-Lopes, L.H., Sañudo, A., Antunes, A.A. and Srougi, M., 2011, May. Change in expression of miR-let7c, miR-100, and miR-218 from high grade localized prostate cancer to metastasis. In *Urologic Oncology: Seminars and Original Investigations* (Vol. 29, No. 3, pp. 265-269). Elsevier.

**Leite2011b**

Leite, K.R., Tomiyama, A., Reis, S.T., Sousa-Canavez, J.M., Sañudo, A., Dall'Oglio, M.F., Camara-Lopes, L.H. and Srougi, M., 2011. MicroRNA-100 expression is independently related to biochemical recurrence of prostate cancer. *The Journal of urology*, 185(3), pp.1118-1122.

**Leite2013** (A corrigendum will be published in *Urologic Oncology*)

Leite, K.R., Tomiyama, A., Reis, S.T., Sousa-Canavez, J.M., Sañudo, A., Camara-Lopes, L.H. and Srougi, M., 2013, August. MicroRNA expression profiles in the progression of prostate cancer—from high-grade prostate intraepithelial neoplasia to metastasis. In *Urologic Oncology: Seminars and Original Investigations* (Vol. 31, No. 6, pp. 796-801). Elsevier.

**Leite2015 (Analysis 1)**

Leite, K.R., Reis, S.T., Viana, N., Morais, D.R., Moura, C.M., Silva, I.A., Pontes Jr, J., Katz, B. and Srougi, M., 2015. Controlling RECK miR21 promotes tumor cell invasion and is related to biochemical recurrence in prostate cancer. *Journal of Cancer*, 6(3), p.292.

**Li2012 (Analysis 1)**

Li, T., Li, R.S., Li, Y.H., Zhong, S., Chen, Y.Y., Zhang, C.M., Hu, M.M. and Shen, Z.J., 2012. miR-21 as an independent biochemical recurrence predictor and potential therapeutic target for prostate cancer. *The Journal of urology*, 187(4), pp.1466-1472.

**Lichner2013**

Lichner, Z., Fendler, A., Saleh, C., Nasser, A.N., Boles, D., Al-Haddad, S., Kupchak, P., Dharsee, M., Nuin, P.S., Evans, K.R. and Jung, K., 2013. MicroRNA signature helps distinguish early from late biochemical failure in prostate cancer. *Clinical chemistry*, 59(11), pp.1595-1603.

**Lichner2015**

Lichner, Z., Ding, Q., Samaan, S., Saleh, C., Nasser, A., Al-Haddad, S., Samuel, J.N., Fleshner, N.E., Stephan, C., Jung, K. and Yousef, G.M., 2015. miRNAs dysregulated in association with Gleason grade regulate extracellular matrix, cytoskeleton and androgen receptor pathways. *The Journal of pathology*, 237(2), pp.226-237.

**Lin2014 (Analysis 3)**

Lin, H.M., Castillo, L., Mahon, K.L., Chiam, K., Lee, B.Y., Nguyen, Q., Boyer, M.J., Stockler, M.R., Pavlakis, N., Marx, G. and Mallesara, G., 2014. Circulating microRNAs are associated with docetaxel chemotherapy outcome in castration-resistant prostate cancer. *British journal of cancer*, 110(10), pp.2462-2471.

**Lin2017 (Analysis 3)**

Lin, H.M., Mahon, K.L., Spielman, C., Gurney, H., Mallesara, G., Stockler, M.R., Bastick, P., Briscoe, K., Marx, G., Swarbrick, A. and Horvath, L.G., 2017. Phase 2 study of circulating microRNA biomarkers in castration-resistant prostate cancer. *British journal of cancer*, 116(8), pp.1002-1011.

**Long2011**

Long, Q., Johnson, B.A., Osunkoya, A.O., Lai, Y.H., Zhou, W., Abramovitz, M., Xia, M., Bouzyk, M.B., Nam, R.K., Sugar, L. and Stanimirovic, A., 2011. Protein-coding and microRNA biomarkers of recurrence of prostate cancer following radical prostatectomy. *The American journal of pathology*, 179(1), pp.46-54.

**McDonald2019**

McDonald, A.C., Vira, M., Walter, V., Shen, J., Raman, J.D., Sanda, M.G., Patil, D. and Taioli, E., 2019. Circulating microRNAs in plasma among men with low-grade and high-grade prostate cancer at prostate biopsy. *The Prostate*, 79(9), pp.961-968.

**Melbø-Jørgensen2014 (Analysis 1)**

Melbø-Jørgensen, C., Ness, N., Andersen, S., Valkov, A., Dønnem, T., Al-Saad, S., Kiselev, Y., Berg, T., Nordby, Y., Bremnes, R.M. and Busund, L.T., 2014. Stromal expression of MiR-21 predicts biochemical failure in prostate cancer patients with Gleason score 6. *PLoS one*, 9(11), p.e113039.

**Mortensen2014**

Mortensen, M.M., Høyer, S., Ørntoft, T.F., Sørensen, K.D., Dyrskjødt, L. and Borre, M., 2014. High miR-449b expression in prostate cancer is associated with biochemical recurrence after radical prostatectomy. *BMC cancer*, 14(1), pp.1-7.

**Nam2018**

Nam, R.K., Wallis, C.J., Amemiya, Y., Benatar, T. and Seth, A., 2018. Identification of a novel MicroRNA panel associated with metastasis following radical prostatectomy for prostate cancer. *Anticancer research*, 38(9), pp.5027-5034.

**Ostano2020**

Ostano, P., Mello-Grand, M., Sesia, D., Gregnanin, I., Peraldo-Neia, C., Guana, F., Jachetti, E., Farsetti, A. and Chiorino, G., 2020. Gene Expression Signature Predictive of Neuroendocrine Transformation in Prostate Adenocarcinoma. *International journal of molecular sciences*, 21(3), p.1078.

**Reis2012**

Reis, S.T., Pontes-Junior, J., Antunes, A.A., Dall'Oglio, M.F., Dip, N., Passerotti, C.C., Rossini, G.A., Morais, D.R., Nesrallah, A.J., Piantino, C. and Srougi, M., 2012. miR-21 may act as an oncomir by targeting RECK, a matrix metalloproteinase regulator, in prostate cancer. *BMC urology*, 12(1), pp.1-7.

**Ren2014**

Ren, Q., Liang, J., Wei, J., Basturk, O., Wang, J., Daniels, G., Gellert, L.L., Li, Y., Shen, Y., Osman, I. and Zhao, J., 2014. Epithelial and stromal expression of miRNAs during prostate cancer progression. *American journal of translational research*, 6(4), p.329.

**Samaan2014**

Samaan, S., Lichner, Z., Ding, Q., Saleh, C., Samuel, J., Streutker, C. and Yousef, G.M., 2014. Kallikreins are involved in an miRNA network that contributes to prostate cancer progression. *Biological chemistry*, 395(9), pp.991-1001.

**Sapre2014**

Sapre, N., Hong, M.K., Macintyre, G., Lewis, H., Kowalczyk, A., Costello, A.J., Corcoran, N.M. and Hovens, C.M., 2014. Curated microRNAs in urine and blood fail to validate as predictive biomarkers for high-risk prostate cancer. *PLoS one*, 9(4), p.e91729.

**Schubert2013**

Schubert, M., Spahn, M., Kneitz, S., Scholz, C.J., Joniau, S., Stroebel, P., Riedmiller, H. and Kneitz, B., 2013. Distinct microRNA expression profile in prostate cancer patients with early clinical failure and the impact of let-7 as prognostic marker in high-risk prostate cancer. *PLoS one*, 8(6), p.e65064.

**Selth2013**

Selth, L.A., Townley, S.L., Bert, A.G., Stricker, P.D., Sutherland, P.D., Horvath, L.G., Goodall, G.J., Butler, L.M. and Tilley, W.D., 2013. Circulating microRNAs predict biochemical recurrence in prostate cancer patients. *British journal of cancer*, 109(3), pp.641-650.

**Sharova, 2021**

Sharova, E., Maruzzo, M., Del Bianco, P., Cavallari, I., Pierantoni, F., Basso, U., Ciminale, V. and Zagonel, V., 2021 Prognostic Stratification of Metastatic Prostate Cancer Patients Treated With Abiraterone and Enzalutamide Through an Integrated Analysis of Circulating Free microRNAs and Clinical Parameters. *Frontiers in Oncology*, 11: 626104.

**Shen2012**

Shen, J., Hrubby, G.W., McKiernan, J.M., Gurvich, I., Lipsky, M.J., Benson, M.C. and Santella, R.M., 2012. Dysregulation of circulating microRNAs and prediction of aggressive prostate cancer. *The Prostate*, 72(13), pp.1469-1477.

**Singh2014**

Singh, P.K., Preus, L., Hu, Q., Yan, L., Long, M.D., Morrison, C.D., Nesline, M., Johnson, C.S., Koochekpour, S., Kohli, M. and Liu, S., 2014. Serum microRNA expression patterns that predict early treatment failure in prostate cancer patients. *Oncotarget*, 5(3), p.824.

**Stuopelytė2016**

Stuopelytė, K., Daniūnaitė, K., Jankevičius, F. and Jarmalaitė, S., 2016. Detection of miRNAs in urine of prostate cancer patients. *Medicina*, 52(2), pp.116-124.

**Suer2019**

Suer, I., Guzel, E., Karatas, O.F., Creighton, C.J., Ittmann, M. and Ozen, M., 2019. MicroRNAs as prognostic markers in prostate cancer. *The Prostate*, 79(3), pp.265-271.

**Watahiki2013**

Watahiki, A., Macfarlane, R.J., Gleave, M.E., Crea, F., Wang, Y., Helgason, C.D. and Chi, K.N., 2013. Plasma miRNAs as biomarkers to identify patients with castration-resistant metastatic prostate cancer. *International journal of molecular sciences*, 14(4), pp.7757-7770.

**Yang2016 (Analysis 3)**

Yang, B., Liu, Z., Ning, H., Zhang, K., Pan, D., Ding, K., Huang, W., Kang, X.L., Wang, Y. and Chen, X., 2016. MicroRNA-21 in peripheral blood mononuclear cells as a novel biomarker in the diagnosis and prognosis of prostate cancer. *Cancer biomarkers*, 17(2), pp.223-230.

**Zedan2017 (Analysis 2)**

Zedan, A.H., Blavnsfeldt, S.G., Hansen, T.F., Nielsen, B.S., Marcussen, N., Pleckaitis, M., Osther, P.J.S. and Sørensen, F.B., 2017. Heterogeneity of miRNA expression in localized prostate cancer with clinicopathological correlations. *PLoS One*, 12(6), p.e0179113.

**Zedan2018**

Zedan, A.H., Hansen, T.F., Assen Holt, J., Pleckaitis, M., Madsen, J.S. and Osther, P.J.S., 2018. microRNA expression in tumour tissue and plasma in patients with newly diagnosed metastatic prostate cancer. *Tumor Biology*, 40(5), p.1010428318775864.

**Zedan2019**

Zedan, A.H., Hansen, T.F., Assen Holt, J., Madsen, J.S. and Osther, P.J., 2019. Circulating miRNAs in localized/locally advanced prostate cancer patients after radical prostatectomy and radiotherapy. *The Prostate*, 79(4), pp.425-432.

**Zhang2011**

Zhang, H.L., Yang, L.F., Zhu, Y., Yao, X.D., Zhang, S.L., Dai, B., Zhu, Y.P., Shen, Y.J., Shi, G.H. and Ye, D.W., 2011. Serum miRNA-21: Elevated levels in patients with metastatic hormone-refractory prostate cancer and potential predictive factor for the efficacy of docetaxel-based chemotherapy. *The prostate*, 71(3), pp.326-331.

**Zhao2019a (Analysis 2)**

Zhao, Z., Weickmann, S., Jung, M., Lein, M., Kilic, E., Stephan, C., Erbersdobler, A., Fendler, A. and Jung, K., 2019. A novel predictor tool of biochemical recurrence after radical prostatectomy based on a five-microRNA tissue

signature. *Cancers*, 11(10), p.1603.

**Zhao2019b**

Zhao, F., Vesprini, D., Liu, R.S., Olkhov-Mitsel, E., Klotz, L.H., Loblaw, A., Liu, S.K. and Bapat, B., 2019, May. Combining urinary DNA methylation and cell-free microRNA biomarkers for improved monitoring of prostate cancer patients on active surveillance. In *Urologic Oncology: Seminars and Original Investigations* (Vol. 37, No. 5, pp. 297-e9). Elsevier.

**Zheng2014**

Zheng, Q., Peskoe, S.B., Ribas, J., Rafiqi, F., Kudrolli, T., Meeker, A.K., De Marzo, A.M., Platz, E.A. and Lupold, S.E., 2014. Investigation of miR-21, miR-141, and miR-221 expression levels in prostate adenocarcinoma for associated risk of recurrence after radical prostatectomy. *The Prostate*, 74(16), pp.1655-1662.

**Zhu2019**

Zhu, L., Zhu, Q., Wen, H., Huang, X. and Zheng, G., 2019. Mutations in GAS5 affect the transformation from benign prostate proliferation to aggressive prostate cancer by affecting the transcription efficiency of GAS5. *Journal of cellular physiology*, 234(6), pp.8928-8940.

ST 7: Rationales for rating down certainty of evidence - GRADE

| Domains                  | Analysis 1.1                                                                                                                                                                                                         | Analysis 1.2                                                                                                                                                                                                                                                | Analysis 2                                                                             | Analysis 3                                                                                                                                   | Analysis 4.1                                                          | Analysis 4.2                                                          |
|--------------------------|----------------------------------------------------------------------------------------------------------------------------------------------------------------------------------------------------------------------|-------------------------------------------------------------------------------------------------------------------------------------------------------------------------------------------------------------------------------------------------------------|----------------------------------------------------------------------------------------|----------------------------------------------------------------------------------------------------------------------------------------------|-----------------------------------------------------------------------|-----------------------------------------------------------------------|
| <b>RoB</b>               | Estimate was unadjusted but sensitivity analysis showed limited difference in HR, rate-down not necessary.<br><br>High RoB in 3 studies (Amankwah2013 – Domain 1, Leite2015 & Li2012 – Domain 6), rate down 1 point. | Visual inspection of the point estimates and CI showed limited difference caused by difference in covariate adjustments, rate-down not necessary.<br><br>High RoB in 3 studies (Amankwah2013 – Domain 1, Leite2015 & Li2012 – Domain 6), rate down 1 point. | Unadjusted estimate and high RoB in 1 study (Zhao2019a – Domain 5), rate down 1 point. | Unadjusted estimate and high RoB in 3 studies (Lin2014, Lin2017 & Sharova2021 – Domain 5), rate down 1 point.                                | High RoB in both studies (Domain 5), rate down 1 point.               | High RoB in both studies (Domain 5), rate down 1 point.               |
| <b>Inconsistency</b>     | Amankwah2013 outlying but low weight (8.5%), rate-down not necessary.                                                                                                                                                | Amankwah2013 outlying but low weight (8.5%), rate-down not necessary.                                                                                                                                                                                       | Both studies showed positive association and CI overlapped, no rate-down.              | Sharova2021 outlying but low weight (8.2%), rate-down not necessary.                                                                         | The two studies showed opposite direction results, rate down 1 point. | The two studies showed opposite direction results, rate down 1 point. |
| <b>Indirectness</b>      | Amankwah2013 RFS endpoint included clinical metastasis and PCa death but low weight, rate-down not necessary.                                                                                                        | Amankwah2013 RFS endpoint included clinical metastasis and PCa death but low weight, rate-down not necessary.                                                                                                                                               | No rate-down.                                                                          | Lin2014 & Lin2017 included CRPC patients, not representing entire PCa population; main aim was to address chemo-response, rate down 1 point. | No rate-down.                                                         | No rate-down.                                                         |
| <b>Imprecision</b>       | Pooled CI well excluded HR of 1 but individual HRs were not reported and hence estimated from available data, rate down 1 point.                                                                                     | Pooled CI well excluded HR of 1, no rate-down.                                                                                                                                                                                                              | Pooled CI close to HR of 1 (CI: 1.01-1.26), rate down 1 point.                         | HR was not reported and hence estimated from available data in Yang 2016. Pooled CI close to HR of 1 (CI: 1.06-2.01), rate down 1 point.     | Wide pooled CI crossing HR of 1 (CI: 0.63-1.88), rate down 1 point.   | Wide pooled CI crossing HR of 1 (CI: 0.70-2.27), rate down 1 point.   |
| <b>Publication bias</b>  | Publication bias was not assessed because there was inadequate number of studies for proper assessment by funnel plot and statistical tests.                                                                         |                                                                                                                                                                                                                                                             |                                                                                        |                                                                                                                                              |                                                                       |                                                                       |
| <b>Overall certainty</b> | LOW                                                                                                                                                                                                                  | MODERATE                                                                                                                                                                                                                                                    | LOW                                                                                    | VERY LOW                                                                                                                                     | VERY LOW                                                              | VERY LOW                                                              |

**CI:** Confidence interval; **CRPC:** Castration-resistant prostate cancer; **HR:** Hazard ratio; **mCRPC:** metastatic castration-resistant prostate cancer; **PCa:** Prostate cancer; **RFS:** Recurrence-free survival; **RoB:** Risk of bias
